# Supplementary material for: Inorganic Mercury Sequestration by a Poly(ethylene imine) Dendrimer in Aqueous Solution
Source: MDPI journal article supplement (doi:10.3390/molecules20033783), 2015-02-26
Supplement: s1 [file s1]

## Supplementary Materials

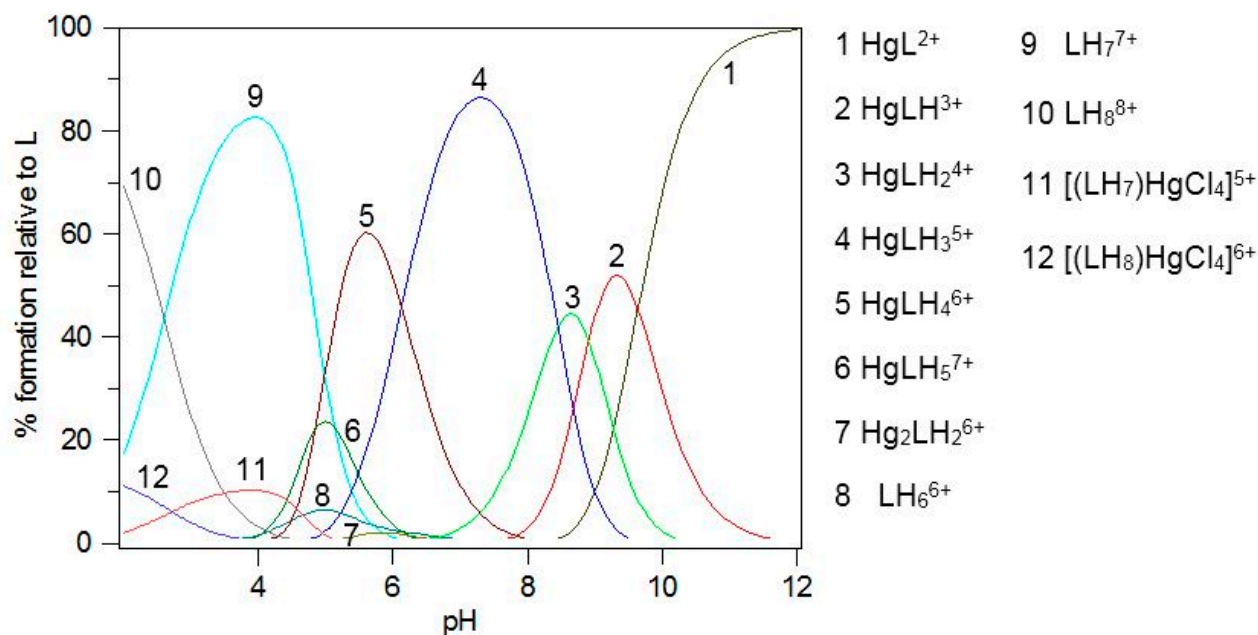

**Figure S1.** Distribution diagram of the species formed in the system  $\text{Hg(II)/L}$  in the presence of  $[\text{Hg(II)}] = [\text{L}] = 1 \times 10^{-3} \text{ M}$ ,  $[\text{Cl}^-] = 0.1 \text{ M}$ , 298.1 K.

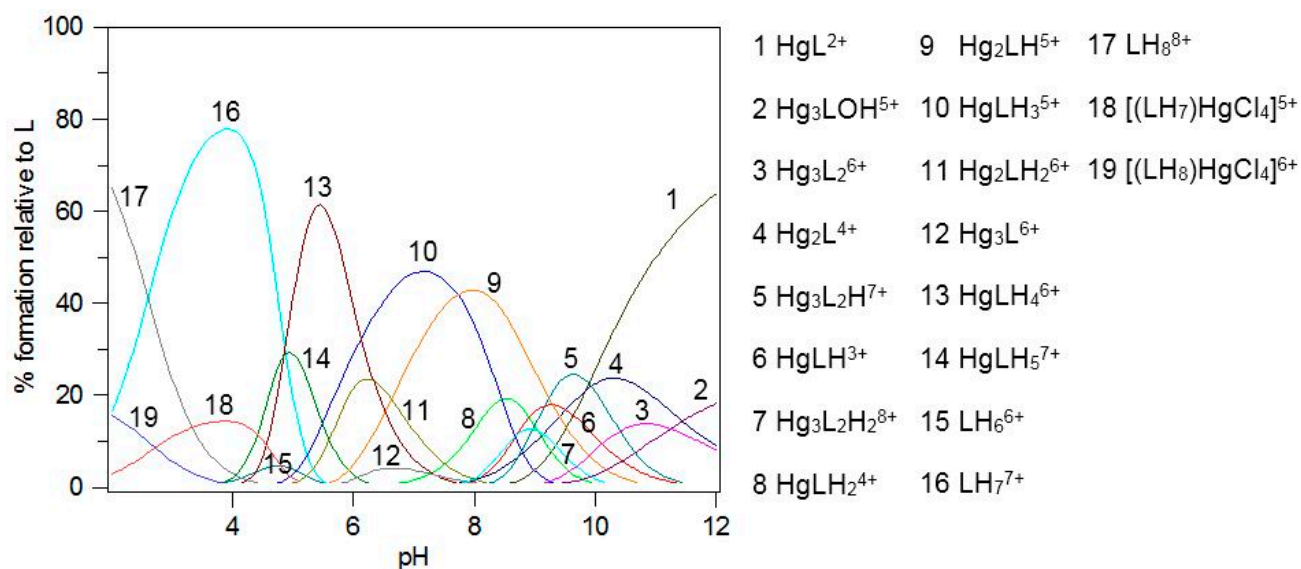

**Figure S2.** Distribution diagram of the species formed in the system  $\text{Hg(II)/L}$  in the presence of  $[\text{Hg(II)}] = 1.5 \times 10^{-3} \text{ M}$ ,  $[\text{L}] = 1 \times 10^{-3} \text{ M}$ ,  $[\text{Cl}^-] = 0.1 \text{ M}$ , 298.1 K.

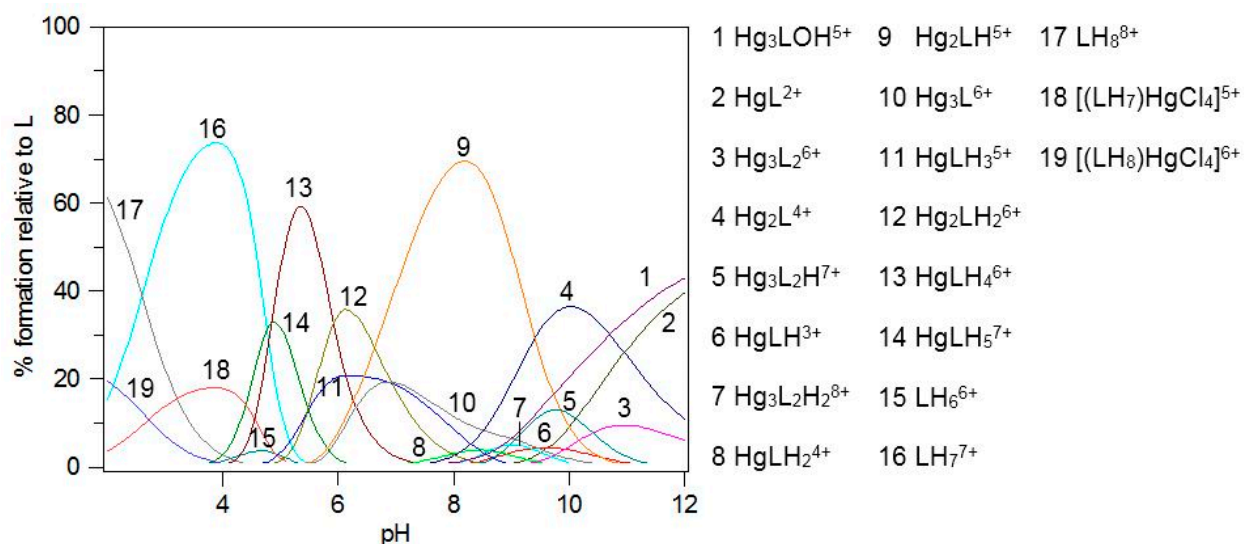

**Figure S3.** Distribution diagram of the species formed in the system  $\text{Hg(II)/L}$  in the presence of  $[\text{Hg(II)}] = 2 \times 10^{-3} \text{ M}$ ,  $[\text{L}] = 1 \times 10^{-3} \text{ M}$ ,  $[\text{Cl}^-] = 0.1 \text{ M}$ , 298.1 K.

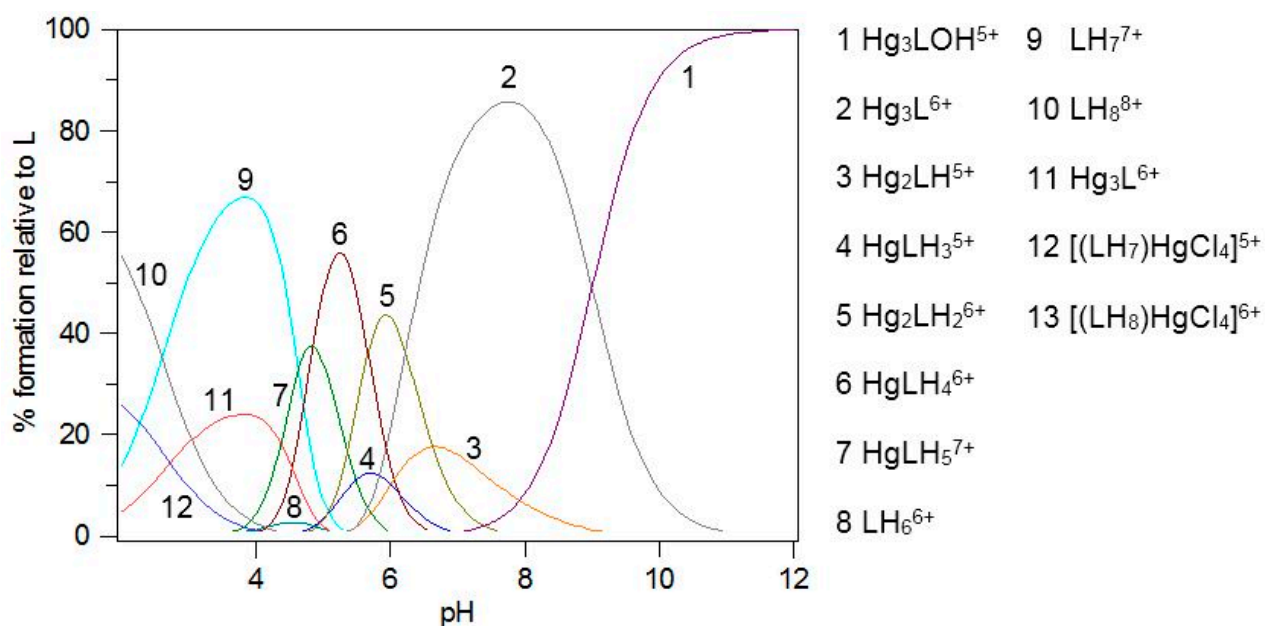

**Figure S4.** Distribution diagram of the species formed in the system  $\text{Hg(II)/L}$  in the presence of  $[\text{Hg(II)}] = 3 \times 10^{-3} \text{ M}$ ,  $[\text{L}] = 1 \times 10^{-3} \text{ M}$ ,  $[\text{Cl}^-] = 0.1 \text{ M}$ , 298.1 K.
